# Supplementary material
Source: PubMed Central journal article supplement (PMC5563273)
Supplement: NIHMS858668-supplement-SI.pdf [file NIHMS858668-supplement-SI.pdf]

## SUPPLEMENTARY MATERIAL

Molecular Determinants for STIM1 Activation During Store-Operated  $\text{Ca}^{2+}$  EntryG. Ma<sup>1</sup>, S. Zheng<sup>2</sup>, Y. Ke<sup>1</sup>, L. Zhou<sup>2</sup>, L. He<sup>1</sup>, Y. Huang<sup>3</sup>, Y. Wang<sup>2</sup> and Y. Zhou<sup>1,4</sup>

<sup>1</sup>Center for Translational Cancer Research, Institute of Biosciences and Technology, Texas A&M University, Houston, TX 77030, USA; <sup>2</sup>Beijing Key Laboratory of Gene Resource and Molecular Development, College of Life Sciences, Beijing Normal University, Beijing 100875, China; <sup>3</sup>Center for Epigenetic and Disease Prevention, Institute of Biosciences and Technology, Texas A&M University, Houston, TX 77030, USA; <sup>4</sup>Department of Medical Physiology, College of Medicine, Texas A&M University, Temple, TX 76504, USA

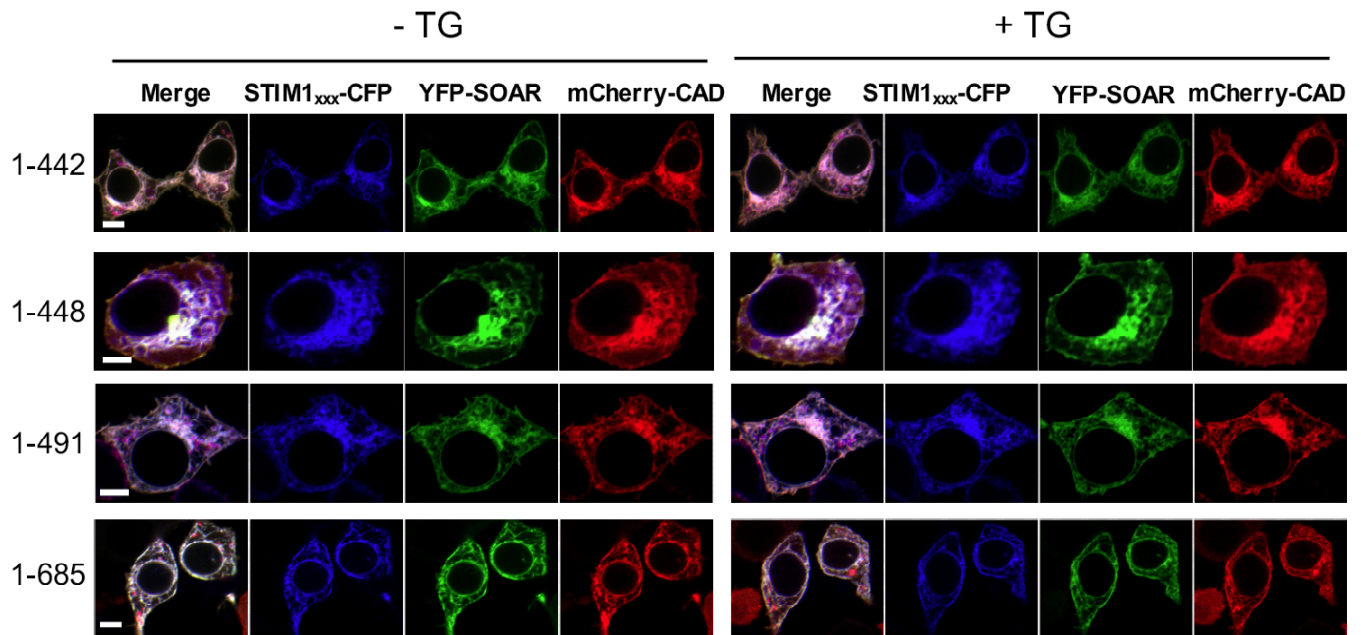

**Fig. (S1).** Confocal images of HeLa cells co-expressing YFP-SOAR, mCherry-CAD with the indicated STIM1-CFP variants (aa 1-442, 1-448, 1-491 or 1-685) before and after store depletion triggered by 1  $\mu\text{M}$  thapsigargin (TG). Scale bar, 5  $\mu\text{m}$ .
